# Supplementary material for: Identification and charactering of APX genes provide new insights in abiotic stresses response in Brassica napus
Source: PeerJ. 2022 Apr 5;10:e13166. doi: 10.7717/peerj.13166 (PMC8992642; doi:10.7717/peerj.13166)
Supplement: Supplemental Information 2 — 26 BnaAPX genes were identified on the basis of their homology with AtAPX genes and nominated as BnaAPX1-26 based on their gene accession number [file peerj-10-13166-s002.xlsx]

## Sheet: Sheet2
Supplement file 1 Detailed information of APX genes in B.napus
Gene name	Locus	Gene accession No.	Chromosome localization	Start	Stop	Strand	Length(bp)	intron number	exon number	Length of protein （aa）	Isoelectric point	Molecular weight/kDa
BnaAPX1	BnaAnng38510D	GSBRNA2T00018112001	chrAnn_random	43569256	43570494	+	591	6	7	197	4.72	21.76
BnaAPX2	BnaC01g39080D	GSBRNA2T00018608001	chrC01	37839059	37840799	-	798	8	9	266	7.3	29.58
BnaAPX3	BnaC08g43490D	GSBRNA2T00019388001	chrC08	37186411	37188533	-	768	6	7	256	5.2	28.31
BnaAPX4	BnaAnng15470D	GSBRNA2T00025176001	chrAnn_random	16542796	16545066	-	747	7	8	249	6.24	27.36
BnaAPX5	BnaC08g02340D	GSBRNA2T00052894001	chrC08	1767893	1769747	+	762	7	8	254	6.04	28.02
BnaAPX6	BnaAnng04450D	GSBRNA2T00060092001	chrAnn_random	4848025	4850798	-	1068	9	10	356	7.27	38.93
BnaAPX7	BnaA03g53120D	GSBRNA2T00071519001	chrA03	27785810	27787981	-	864	8	9	288	7.18	31.71
BnaAPX8	BnaA01g32170D	GSBRNA2T00072849001	chrA01	21700742	21703286	-	834	8	9	278	7.33	30.87
BnaAPX9	BnaA01g32160D	GSBRNA2T00072850001	chrA01	21698855	21700596	-	798	8	9	266	7.3	29.58
BnaAPX10	BnaC02g13690D	GSBRNA2T00073666001	chrC02	8992575	8994814	-	1209	11	12	403	7.28	43.27
BnaAPX11	BnaC02g13690D	GSBRNA2T00077784001	chrA03	27082167	27084340	+	975	8	9	325	8.65	35.81
BnaAPX12	BnaA07g12740D	GSBRNA2T00081647001	chrA07	11419543	11421064	-	1014	3	4	338	8.62	37.42
BnaAPX13	BnaC07g43770D	GSBRNA2T00099848001	chrC07	42659388	42661463	+	951	9	10	317	7.5	34.94
BnaAPX14	BnaC07g45330D	GSBRNA2T00100043001	chrC07	43467714	43470031	-	864	8	9	288	7.18	31.72
BnaAPX15	BnaC05g05550D	GSBRNA2T00100654001	chrC05	2699663	2702158	+	753	9	10	251	5.79	27.61
BnaAPX16	BnaA03g39250D	GSBRNA2T00113662001	chrA03	19566368	19568832	-	867	8	9	289	5.62	31.7
BnaAPX17	BnaC09g25210D	GSBRNA2T00118970001	chrC09	24461296	24464153	-	1068	10	11	356	7.59	38.83
BnaAPX18	BnaC03g28340D	GSBRNA2T00119786001	chrC03	16712911	16715100	-	1047	9	10	349	8.73	37.98
BnaAPX19	BnaA01g01600D	GSBRNA2T00121443001	chrA01	848378	849926	-	843	7	8	281	7.99	31.08
BnaAPX20	BnaA09g49190D	GSBRNA2T00122207001	chrA09	32785566	32787655	-	762	6	7	254	6.24	27.99
BnaAPX21	BnaC01g02640D	GSBRNA2T00130985001	chrC01	1386224	1387994	-	843	7	8	281	7.61	30.99
BnaAPX22	BnaA07g33560D	GSBRNA2T00146509001	chrA07	22992877	22995400	+	1317	9	10	439	8.08	47.47
BnaAPX23	BnaC06g38150D	GSBRNA2T00147894001	chrC06	35836567	35839141	+	1317	10	11	439	8.08	47.43
BnaAPX24	BnaC03g46570D	GSBRNA2T00150172001	chrC03	31567371	31570038	-	867	8	9	289	5.62	31.67
BnaAPX25	BnaA03g23840D	GSBRNA2T00151377001	chrA03	11436094	11438251	-	1047	9	10	349	8.42	37.85
BnaAPX26	BnaA06g04380D	GSBRNA2T00156290001	chrA06	2615910	2618421	+	918	8	9	306	5.8	33.96
