# Supplementary material for: Identification and charactering of APX genes provide new insights in abiotic stresses response in Brassica napus
Source: PeerJ. 2022 Apr 5;10:e13166. doi: 10.7717/peerj.13166 (PMC8992642; doi:10.7717/peerj.13166)
Supplement: Supplemental Information 6 [file peerj-10-13166-s006.xlsx]

## Sheet: APX
	0h		3h		6h		9h		12h
NaCl	2.3244		4.07267		1.52973		1.0132		0.782168
PEG	2.4138		3.67533		6.66527		3.576		3.54888
40℃	2.384		2.88067		4.854		2.2456		1.88457

## Sheet: H2O2
	0h		3h		6h		9h		12h
NaCl	12.0834		5.89033		15.8798		18.6755		18.9032
PEG	12.1054		9.22875		3.68965		8.15785		10.7825
40℃	12.0984		10.1877		4.78709		13.9187		14.9346
